# Supplementary material for: Two state reactivity (TSR) and hydrogen tunneling reaction kinetics measured in the Co+ mediated decomposition of CH3CHO
Source: Royal Society of Chemistry journal article supplement (doi:10.1039/d2cp05042k), 2023-01-01
Supplement: d2cp05042k1.pdf [file d2cp05042k1.pdf]

## Two State Reactivity (TSR) and Hydrogen Tunneling Reaction Kinetics Measured in the $\text{Co}^+$ Mediated Decomposition of $\text{CH}_3\text{CHO}$

### Supplemental Information

#### I. SPIDRR results at several AL photon energies.

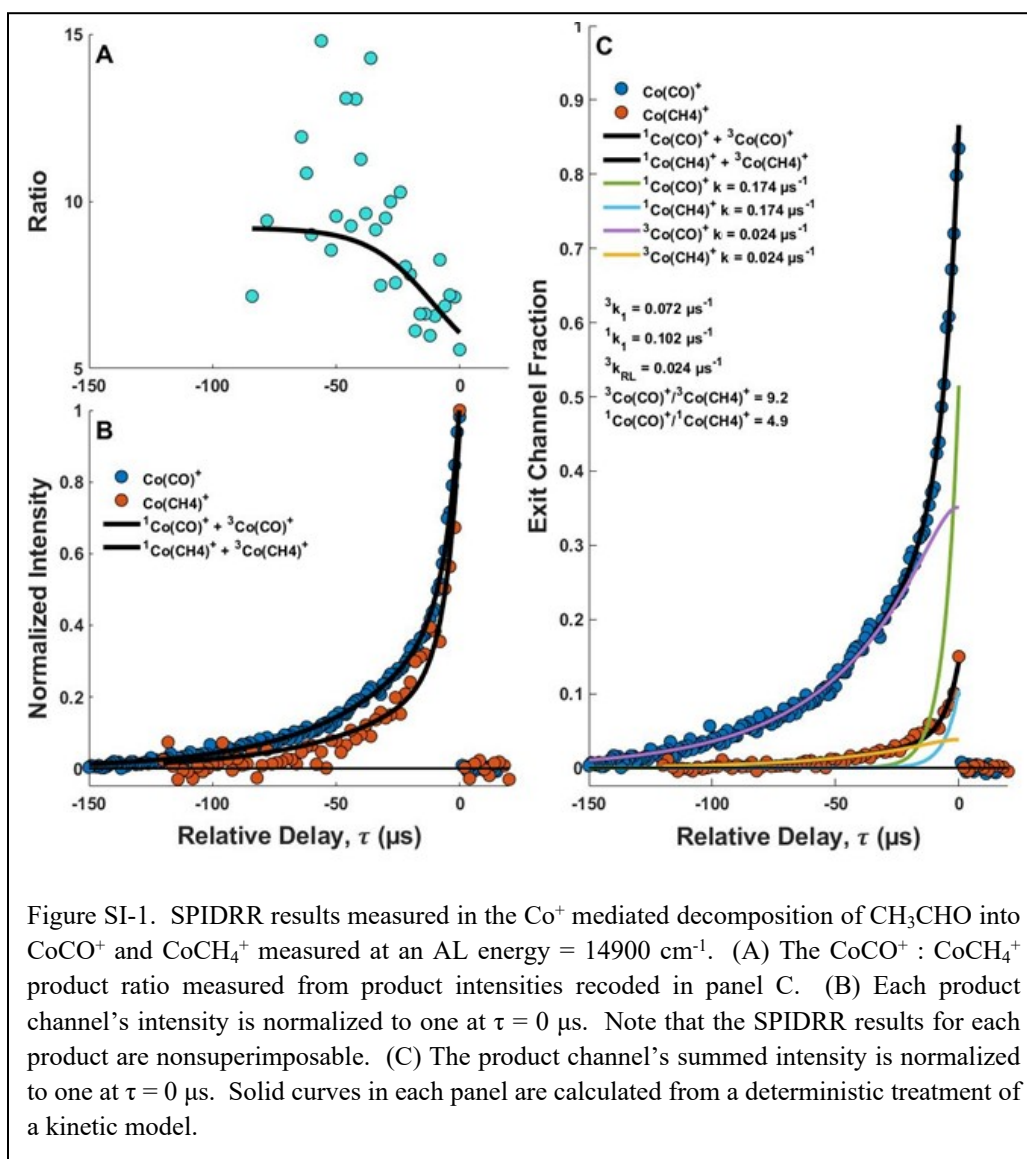

Figure SI-1. SPIDRR results measured in the  $\text{Co}^+$  mediated decomposition of  $\text{CH}_3\text{CHO}$  into  $\text{CoCO}^+$  and  $\text{CoCH}_4^+$  measured at an AL energy =  $14900 \text{ cm}^{-1}$ . (A) The  $\text{CoCO}^+ : \text{CoCH}_4^+$  product ratio measured from product intensities recorded in panel C. (B) Each product channel's intensity is normalized to one at  $\tau = 0 \mu\text{s}$ . Note that the SPIDRR results for each product are nonsuperimposable. (C) The product channel's summed intensity is normalized to one at  $\tau = 0 \mu\text{s}$ . Solid curves in each panel are calculated from a deterministic treatment of a kinetic model.

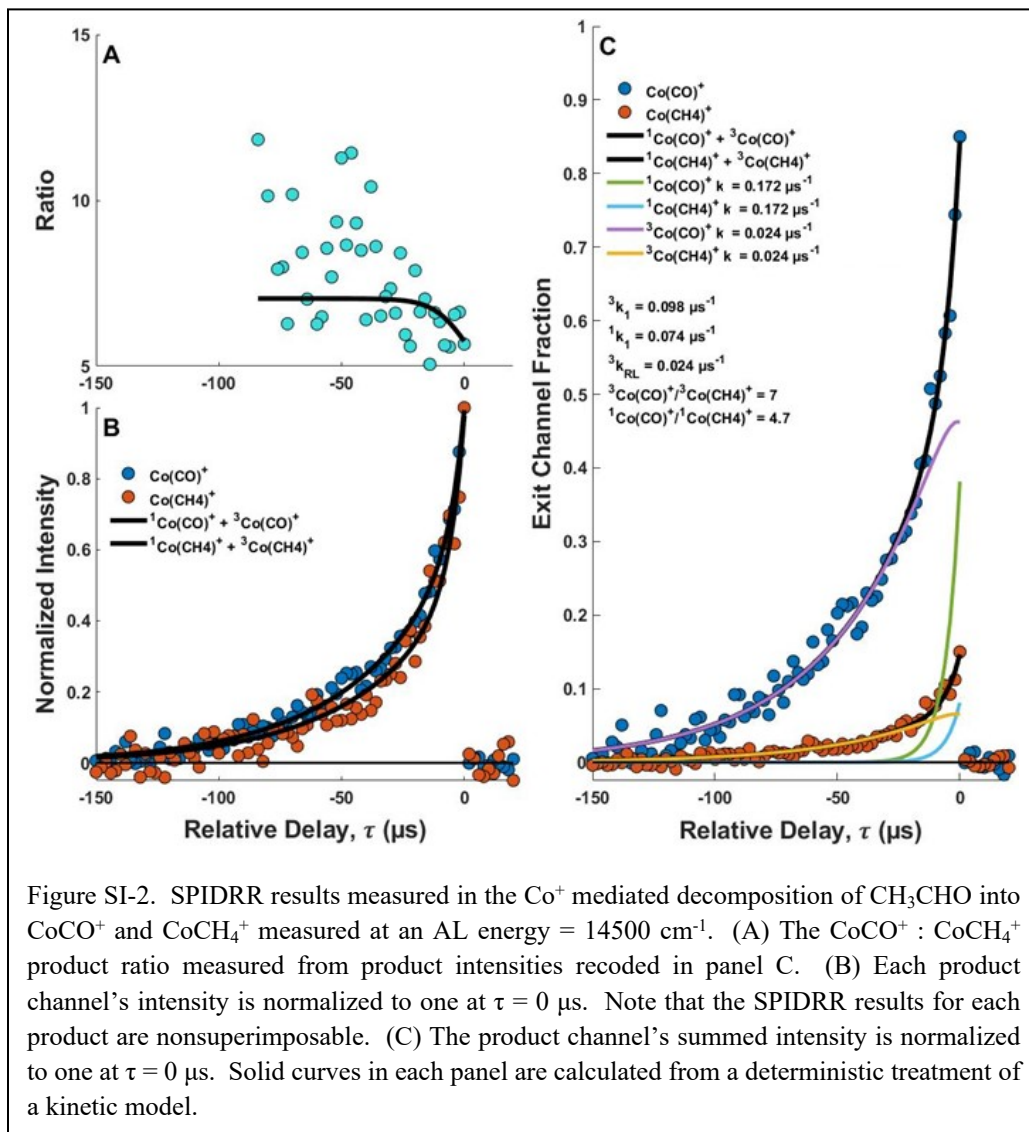

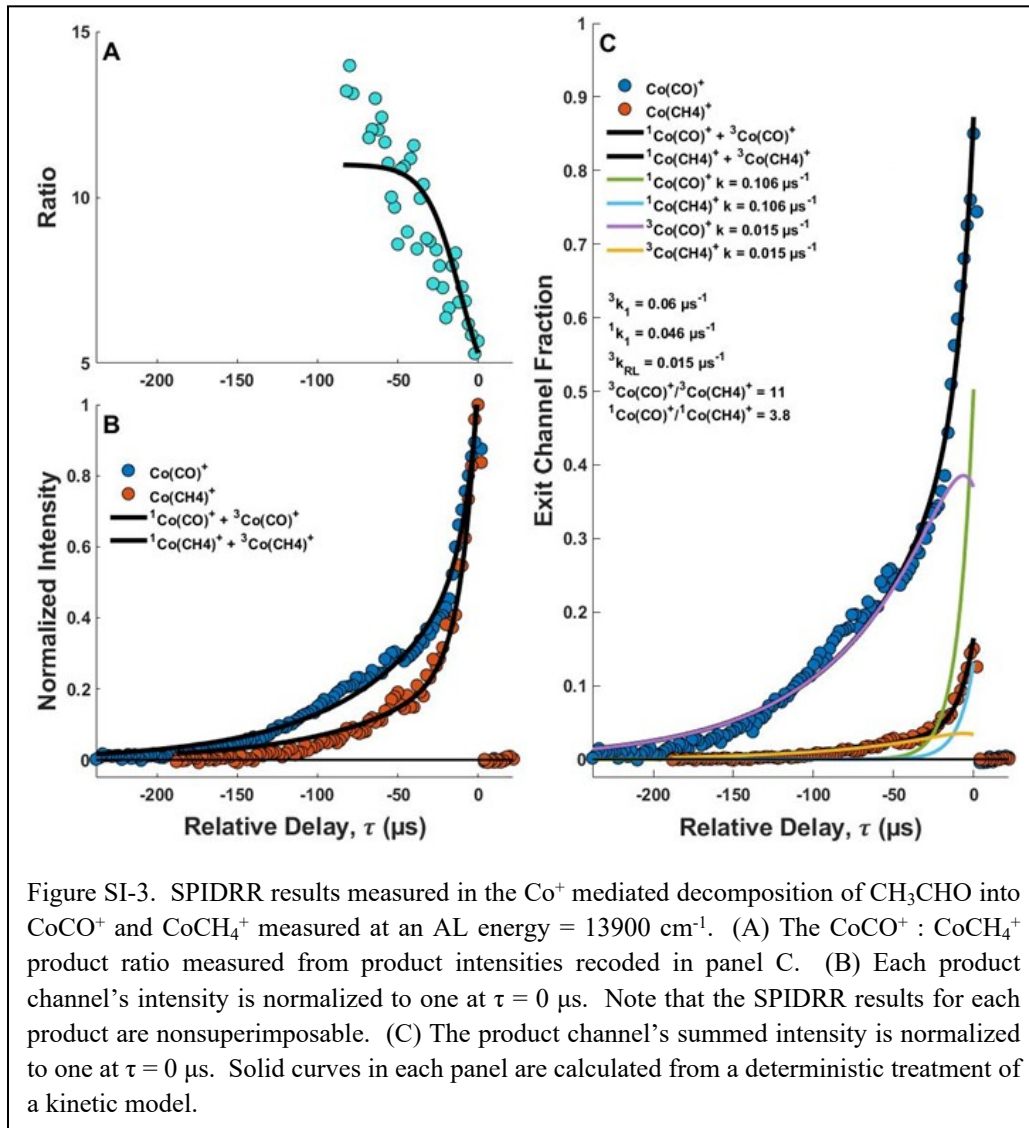

## II) Theory

### Molecular Coordinates (Å)

Stationary points were calculated at the (u)PBE0/aug-cc-pVTZ level of theory

#### <sup>1</sup>EC

|    |           |           |           |
|----|-----------|-----------|-----------|
| C  | 2.109766  | -0.733089 | 0.000014  |
| H  | 1.374939  | -1.538041 | -0.000040 |
| H  | 2.767155  | -0.822293 | 0.872157  |
| H  | 2.767545  | -0.822464 | -0.871804 |
| C  | 1.506450  | 0.604054  | -0.000212 |
| H  | 2.170175  | 1.476140  | -0.000309 |
| O  | 0.299221  | 0.845246  | -0.000066 |
| Co | -1.228551 | -0.158559 | 0.000063  |

#### <sup>1</sup>TS1

|    |           |           |           |
|----|-----------|-----------|-----------|
| C  | -1.313465 | 0.749481  | 0.181624  |
| H  | -1.645715 | 0.350829  | 1.149259  |
| H  | -2.021716 | 0.607666  | -0.637757 |
| H  | -1.182232 | 1.825656  | 0.347472  |
| C  | 0.499477  | 0.936558  | -0.418827 |
| H  | 0.591676  | 1.797531  | -1.082644 |
| O  | 1.287121  | 0.504894  | 0.414534  |
| Co | -0.042780 | -0.693966 | -0.061829 |

#### <sup>1</sup>INT1

|    |           |           |           |
|----|-----------|-----------|-----------|
| C  | -1.533637 | 0.735808  | 0.128992  |
| H  | -2.043888 | 0.329355  | 1.014379  |
| H  | -2.085919 | 0.548133  | -0.806421 |
| H  | -1.304508 | 1.791042  | 0.251442  |
| C  | 1.158045  | 0.559120  | -0.503994 |
| H  | 1.722178  | 1.236952  | -1.153765 |
| O  | 1.369721  | 0.221111  | 0.638374  |
| Co | -0.184892 | -0.497924 | -0.080097 |

#### <sup>1</sup>TS2

|    |           |           |           |
|----|-----------|-----------|-----------|
| C  | 1.231044  | 1.158464  | 0.033834  |
| H  | 0.913978  | 1.699832  | -0.862297 |
| H  | 2.292892  | 0.868343  | -0.014068 |
| H  | 1.016975  | 1.723900  | 0.939461  |
| C  | -1.157387 | 0.009689  | 0.352730  |
| H  | -1.123537 | -0.217564 | 1.468838  |
| O  | -2.036475 | 0.438378  | -0.275714 |
| Co | 0.472206  | -0.540387 | -0.060948 |

#### <sup>1</sup>INT2

|   |           |           |           |
|---|-----------|-----------|-----------|
| C | -1.194519 | 1.182233  | -0.006214 |
| H | -0.765923 | 1.937851  | -0.658905 |
| H | -2.191052 | 0.859605  | -0.362843 |
| H | -0.251217 | -0.515875 | -1.353623 |

|    |           |           |           |
|----|-----------|-----------|-----------|
| C  | 1.172003  | 0.000271  | 0.050417  |
| H  | -1.204112 | 1.495478  | 1.046432  |
| O  | 2.227062  | 0.375530  | -0.011772 |
| Co | -0.491448 | -0.513938 | 0.042885  |

### **<sup>1</sup>TS3**

|    |           |           |           |
|----|-----------|-----------|-----------|
| C  | 1.357440  | 1.098373  | -0.040134 |
| H  | 1.185535  | 1.961365  | 0.599239  |
| H  | 2.372751  | 0.696438  | 0.118345  |
| H  | 0.535723  | 0.225980  | 1.179449  |
| C  | -1.222813 | 0.030549  | -0.028906 |
| H  | 1.173531  | 1.360730  | -1.090794 |
| O  | -2.267561 | 0.437196  | 0.002442  |
| Co | 0.446859  | -0.537615 | -0.015242 |

### **<sup>1</sup>PC**

|    |           |           |           |
|----|-----------|-----------|-----------|
| C  | 2.372638  | 0.286167  | 0.002176  |
| H  | 3.435273  | 0.051899  | -0.065686 |
| H  | 2.207315  | 0.823651  | 0.939777  |
| H  | 2.112894  | 0.867815  | -0.889042 |
| C  | -1.568642 | 0.068805  | 0.000427  |
| H  | 1.967215  | -0.767583 | 0.007590  |
| O  | -2.679757 | 0.210968  | 0.000429  |
| Co | 0.255236  | -0.177532 | -0.000433 |

### **<sup>1</sup>Co(CO)<sup>+</sup>**

|    |           |           |          |
|----|-----------|-----------|----------|
| C  | 0.001110  | 0.984616  | 0.000000 |
| O  | -0.000833 | 2.102734  | 0.000000 |
| Co | 0.000000  | -0.841836 | 0.000000 |

### **<sup>1</sup>Co(CH<sub>4</sub>)<sup>+</sup>**

|    |           |           |           |
|----|-----------|-----------|-----------|
| C  | 1.537649  | -0.020507 | 0.011119  |
| H  | 1.738377  | -0.227203 | 1.061057  |
| H  | 2.431927  | 0.392378  | -0.459291 |
| H  | 1.280603  | -0.920216 | -0.568033 |
| H  | 0.876323  | 0.904851  | -0.110563 |
| Co | -0.576042 | -0.000991 | 0.000375  |

### **<sup>3</sup>EC**

|    |           |           |           |
|----|-----------|-----------|-----------|
| C  | 2.274453  | -0.692350 | 0.000111  |
| H  | 1.598281  | -1.545558 | 0.000201  |
| H  | 2.938063  | -0.729745 | 0.871328  |
| H  | 2.938133  | -0.729994 | -0.871041 |
| C  | 1.572509  | 0.596297  | -0.000124 |
| H  | 2.180354  | 1.510709  | -0.000056 |
| O  | 0.354619  | 0.748727  | -0.000112 |
| Co | -1.317539 | -0.145145 | 0.000020  |

**<sup>3</sup>TS1**

|    |           |           |           |
|----|-----------|-----------|-----------|
| C  | 1.238965  | 1.051512  | 0.146999  |
| H  | 2.078541  | 0.521439  | 0.629704  |
| H  | 0.895169  | 1.817049  | 0.845080  |
| H  | 1.551600  | 1.499575  | -0.793192 |
| C  | -0.835025 | 0.811139  | -0.280659 |
| H  | -0.960400 | 1.735201  | -0.857650 |
| O  | -1.665797 | 0.165897  | 0.285346  |
| Co | 0.271772  | -0.669494 | -0.048324 |

**<sup>3</sup>INT1**

|    |           |           |           |
|----|-----------|-----------|-----------|
| C  | -1.700307 | 0.668026  | -0.000112 |
| H  | -2.445079 | -0.149387 | 0.000567  |
| H  | -1.795460 | 1.265636  | -0.904033 |
| H  | -1.794911 | 1.266224  | 0.903509  |
| C  | 0.999768  | 0.888521  | 0.000098  |
| H  | 1.083495  | 1.983373  | 0.000305  |
| O  | 1.836755  | 0.043135  | -0.000133 |
| Co | -0.205143 | -0.520378 | 0.000030  |

**<sup>3</sup>TS2**

|    |          |          |          |
|----|----------|----------|----------|
| C  | -0.83297 | 1.4265   | -0.02452 |
| H  | -1.74519 | 1.75679  | -0.54209 |
| H  | 0.03394  | 2.02585  | -0.29019 |
| H  | -0.98312 | 1.34364  | 1.05122  |
| C  | 1.26936  | -0.37168 | 0.08195  |
| H  | 1.42759  | -1.49069 | 0.75869  |
| O  | 2.05239  | 0.28545  | -0.51009 |
| Co | -0.67121 | -0.49658 | -0.02431 |

**<sup>3</sup>INT2**

|    |           |           |           |
|----|-----------|-----------|-----------|
| C  | -0.687549 | 1.450628  | 0.000569  |
| H  | -1.789245 | 1.525386  | -0.012041 |
| H  | -0.257250 | 1.890525  | -0.895897 |
| H  | -0.277802 | 1.884960  | 0.909466  |
| C  | 1.124909  | -0.294341 | 0.000925  |
| H  | 0.967236  | -1.464801 | 0.005520  |
| O  | 2.135565  | 0.257710  | -0.000865 |
| Co | -0.679690 | -0.475388 | -0.000337 |

**<sup>3</sup>TS3**

|    |           |           |           |
|----|-----------|-----------|-----------|
| C  | -1.901028 | 0.785246  | -0.044245 |
| H  | -2.758901 | 0.124393  | 0.124268  |
| H  | -1.895794 | 1.175097  | -1.067325 |
| H  | -1.871832 | 1.589425  | 0.686445  |
| C  | 1.374689  | 0.157543  | 0.076278  |
| H  | 0.592426  | 0.755368  | 0.824948  |
| O  | 2.478289  | 0.393712  | -0.100865 |
| Co | -0.397562 | -0.461137 | 0.001718  |

**<sup>3</sup>PC**

|    |           |           |           |
|----|-----------|-----------|-----------|
| C  | -2.389345 | 0.306548  | 0.012369  |
| H  | -2.472644 | 0.686786  | 1.029779  |
| H  | -3.386222 | 0.193408  | -0.414147 |
| H  | -1.874497 | 1.016599  | -0.658238 |
| C  | 1.593581  | 0.070209  | 0.001458  |
| H  | -2.037922 | -0.760959 | -0.005495 |
| O  | 2.701708  | 0.233773  | 0.002239  |
| Co | -0.261770 | -0.195058 | -0.001954 |

**<sup>3</sup>Co(CO)<sup>+</sup>**

|    |           |           |          |
|----|-----------|-----------|----------|
| C  | 0.001864  | 1.017042  | 0.000000 |
| O  | -0.001398 | 2.135427  | 0.000000 |
| Co | 0.000000  | -0.858729 | 0.000000 |

**<sup>3</sup>Co(CH<sub>4</sub>)<sup>+</sup>**

|    |           |           |           |
|----|-----------|-----------|-----------|
| C  | 1.540463  | 0.000000  | 0.007546  |
| H  | 2.018282  | -0.000072 | 0.984393  |
| H  | 2.278806  | 0.000062  | -0.793311 |
| H  | 1.000946  | -0.980369 | -0.122092 |
| H  | 1.000936  | 0.980381  | -0.121968 |
| Co | -0.575620 | 0.000000  | 0.000285  |

**CP1**

|    |               |               |               |
|----|---------------|---------------|---------------|
| C  | -0.1097268510 | 2.4778854281  | 0.3326993763  |
| H  | -0.6229767308 | 2.5294318065  | -0.6396883618 |
| H  | 0.7027802118  | 3.1935248366  | 0.3964571295  |
| H  | -0.7875204412 | 2.5568085570  | 1.1975898180  |
| C  | 1.7387772589  | 0.8401305125  | 0.5650114008  |
| H  | 0.8823823726  | -0.1860350099 | -0.6195655310 |
| O  | 2.8462757027  | 1.0089291968  | 0.6782544524  |
| CO | 0.0475231771  | 0.5863823725  | 0.3549540156  |

**CP2**

|    |               |               |               |
|----|---------------|---------------|---------------|
| C  | 1.2489631289  | 1.1468338963  | 0.0689587164  |
| H  | 0.8372991795  | 1.9107176089  | 0.7221969780  |
| H  | 2.2612448362  | 0.8516417198  | 0.3818310601  |
| H  | 0.3719578842  | -0.2714647465 | 1.2863483069  |
| C  | -1.3040428669 | -0.0501389700 | -0.1032849347 |
| H  | 1.2058366374  | 1.4471525349  | -0.9902770814 |
| O  | -2.3608325306 | 0.3033815242  | 0.0057343048  |
| CO | 0.4387814313  | -0.5169670675 | -0.1178842500 |

## Energies and Vibrational Frequencies

Energies and Vibrational Frequencies at the PBE0/aug-cc-pVTZ level of theory.

| Structure         | Energies (Hartrees) | Energies Relative to <sup>3</sup> EC (cm <sup>-1</sup> ) | Vibrational Frequencies (cm <sup>-1</sup> )                                                                                                                                                  |
|-------------------|---------------------|----------------------------------------------------------|----------------------------------------------------------------------------------------------------------------------------------------------------------------------------------------------|
| <sup>1</sup> EC   | -1535.9541411600    | 17502                                                    | 101.9291, 147.7549, 274.3041, 444.6386, 542.1604, 785.6500, 919.5916, 1121.9061, 1159.2797, 1369.552, 1422.8861, 1430.4910, 1451.5852, 1723.6867, 3033.1932, 3089.6727, 3094.7215, 3148.8983 |
| <sup>1</sup> TS1  | -1535.9245665700    | 23993                                                    | -294.1634, 179.3545, 319.9773, 494.1351, 528.6882, 671.2699, 709.7947, 827.2147, 944.2556, 1167.0556, 1257.8179, 1403.6637, 1410.8102, 1611.2356, 3001.4534, 3078.5464, 3142.5104, 3152.3156 |
| <sup>1</sup> INT1 | -1535.9360507400    | 21473                                                    | 111.6447, 165.2726, 195.8172, 477.1204, 544.7191, 618.8389, 655.6874, 741.4042, 882.0553, 1121.5563, 1223.2771, 1369.3393, 1423.1411, 1699.9798, 2961.5638, 3065.9593, 3113.5932, 3183.0161  |
| <sup>1</sup> TS2  | -1535.9065182900    | 27954                                                    | -347.6419, 89.1499, 114.9202, 242.0872, 424.5730, 562.4308, 593.1125, 701.8139, 745.1575, 1079.7291, 1232.4850, 1386.0733, 1421.4846, 1967.6172, 2638.1673, 2977.2151, 3100.1260, 3164.1427  |
| <sup>1</sup> INT2 | -1535.9524374800    | 17876                                                    | 126.0074, 160.8536, 375.8911, 429.1318, 468.7643, 502.7044, 582.2521, 660.1961, 762.0903, 774.2813, 1223.0426, 1363.1921, 1420.9635, 2183.1912, 2261.3719, 2937.3813, 3064.0266, 3187.7515   |
| <sup>1</sup> TS3  | -1535.9461589600    | 19254                                                    | -750.7294, 105.5598, 150.2576, 345.0090, 415.5412, 454.0665, 559.5683, 677.7785, 850.8165, 869.0435, 1249.9371, 1374.7213, 1435.8505, 1435.8505, 2256.8956, 2959.8330, 3066.9799, 3170.4574  |
| <sup>1</sup> PC   | -1535.9691391200    | 14211                                                    | 28.7822, 83.8175, 151.1613, 284.5637, 399.1108, 408.5796, 431.2466, 560.2803, 1264.9431, 1293.8641, 1361.4814, 1489.7192, 1610.2077, 2271.8068, 2733.2425, 3040.4535, 3125.7796,             |



|                                                |                  |       |                                                                                                                                                                                                          |
|------------------------------------------------|------------------|-------|----------------------------------------------------------------------------------------------------------------------------------------------------------------------------------------------------------|
|                                                |                  |       | 3153.7156,                                                                                                                                                                                               |
| <sup>1</sup> Co <sup>+</sup>                   | -1382.1452040000 |       |                                                                                                                                                                                                          |
| <sup>1</sup> Co(CO) <sup>+</sup>               | -1495.4552953700 |       | 340.0250, 434.0331, 2290.1538                                                                                                                                                                            |
| <sup>1</sup> Co(CH <sub>4</sub> ) <sup>+</sup> | -1422.6665373400 |       | 82.1146, 294.0038, 608.6766, 1191.0935,<br>1313.0136, 1384.1104, 1462.9370,<br>1662.2236, 2563.0186, 3003.5334,<br>3116.8922, 3171.9712                                                                  |
| <sup>3</sup> EC                                | -1536.0338882700 | 0     | 84.1940, 133.2817, 234.5009, 375.4638,<br>518.8055, 774.5738, 920.4549, 1129.3788,<br>1156.9436, 1369.8271, 1424.2054,<br>1435.6957, 1450.2291, 1742.0418,<br>3035.2157, 3065.0130, 3094.0062, 3162.4206 |
| <sup>3</sup> TS1                               | -1535.9639330000 | 15353 | -217.9619, 111.6464, 192.1105, 296.5244,<br>471.0379, 612.7154, 649.0971, 804.5694,<br>934.3298, 1207.6647, 1248.9559, 1405.9214,<br>1437.6851, 1765.7262, 2965.4341,<br>3080.7635, 3106.4681, 3181.0035 |
| <sup>3</sup> INT1                              | -1535.9703097800 | 13954 | 63.0580, 126.1407, 153.1500, 277.6969,<br>490.3481, 643.1579, 675.7213, 706.5371,<br>833.4113, 1131.9825, 1206.6380, 1376.9425,<br>1435.7707, 1802.9417, 2958.2850,<br>3073.1152, 3131.4638, 3194.9867   |
| <sup>3</sup> TS2                               | -1535.9342341700 | 21872 | -197.7871, 137.1046, 279.4303, 331.1384,<br>391.0396, 477.2086, 593.8843, 708.9005,<br>952.1047, 1133.7809, 1193.9424, 1365.3855,<br>1374.3045, 1422.4197, 1823.5625,<br>3008.9341, 3126.6430, 3200.4264 |
| <sup>3</sup> INT2                              | -1535.9557378600 | 17152 | 86.2242, 124.6264, 173.3359, 211.2425,<br>454.4832, 488.3171, 591.3794, 709.0368,<br>767.1572, 1135.1828, 1209.6392, 1379.8104,<br>1432.5477, 2048.4920, 2295.7884,<br>2968.8340, 3139.1428, 3201.3962,  |
| <sup>3</sup> TS3                               | -1535.9297831400 | 22848 | -798.7111, 83.5926, 127.5958, 208.9956,<br>304.1409, 397.9465, 508.2441, 565.7994,<br>651.3237, 784.5493, 1094.8615, 1378.0068,<br>1414.7586, 1806.8107, 2081.4047,<br>3016.7645, 3114.3728, 3182.1036   |
| <sup>3</sup> PC                                | -1536.0521751600 | -4014 | 67.6467, 74.7469, 155.7022, 287.4118,<br>355.1019, 362.4950, 414.1091, 502.3594,<br>1215.9899, 1323.9188, 1379.0574,                                                                                     |

|                              |                  |       |                                                                                                                                         |
|------------------------------|------------------|-------|-----------------------------------------------------------------------------------------------------------------------------------------|
|                              |                  |       | 1508.0608, 1579.5005, 2273.3709,<br>2768.6588, 2984.2072, 3119.2703, 3172.6472                                                          |
| $^3\text{Co}^+$              | -1382.2455750800 |       |                                                                                                                                         |
| $^3\text{Co}(\text{CO})^+$   | -1495.4552953700 |       | 311.0820, 405.5742, 2290.6417                                                                                                           |
| $^3\text{Co}(\text{CH}_4)^+$ | -1422.6665373400 |       | 87.7208, 394.0553, 563.9285, 1159.4572,<br>1364.9362, 1407.0434, 1495.9002,<br>1581.9549, 2699.5163, 2808.5476,<br>3118.7453, 3191.2799 |
| CP1                          | -1535.9343534000 | 21845 |                                                                                                                                         |
| CP2                          | -1535.9482612450 | 18793 |                                                                                                                                         |
| $\text{CH}_3\text{CHO}$      | -153.7101966870  |       |                                                                                                                                         |
| CO                           | -113.2270298210  |       |                                                                                                                                         |
| $\text{CH}_4$                | -40.4745863079   |       |                                                                                                                                         |

## Single Point Energy Corrections

CASPT2(2,2)/aug-cc-pVTZ single point energy corrections to DFT structures.

| Structure                                           | Energy (Hartrees) | Energy Relative to <sup>3</sup> EC (cm <sup>-1</sup> ) |
|-----------------------------------------------------|-------------------|--------------------------------------------------------|
| <sup>1</sup> Co + CH <sub>3</sub> CHO               | -1535.2978038544  | 31485                                                  |
| <sup>1</sup> EC                                     | -1535.3788656997  | 13694                                                  |
| <sup>1</sup> TS1                                    | -1535.3334168995  | 23668                                                  |
| <sup>1</sup> INT1                                   | -1535.3221987673  | 26131                                                  |
| <sup>1</sup> TS2                                    | -1535.2893473634  | 33341                                                  |
| <sup>1</sup> INT2                                   | -1535.3854547814  | 12247                                                  |
| <sup>1</sup> TS3                                    | -1535.3784011596  | 13796                                                  |
| <sup>1</sup> PC                                     | -1535.4209070145  | 4467                                                   |
| <sup>1</sup> Co(CO) <sup>+</sup> + CH <sub>4</sub>  | -1535.3760539878  | 14311                                                  |
| <sup>1</sup> Co(CH <sub>4</sub> ) <sup>+</sup> + CO | -1535.3414729955  | 21900                                                  |
| <sup>3</sup> Co + CH <sub>3</sub> CHO               | -1535.3625297546  | 17279                                                  |
| <sup>3</sup> EC                                     | -1535.4412581183  | 0                                                      |
| <sup>3</sup> TS1                                    | -1535.3850530305  | 12336                                                  |
| <sup>3</sup> INT1                                   | -1535.3940640200  | 10358                                                  |
| <sup>3</sup> TS2                                    | -1535.3560925510  | 18692                                                  |
| <sup>3</sup> INT2                                   | -1535.3809705814  | 13232                                                  |
| <sup>3</sup> TS3                                    | -1535.3433507107  | 21488                                                  |
| <sup>3</sup> PC                                     | -1535.4807452026  | -8666                                                  |
| <sup>3</sup> Co(CO) <sup>+</sup> + CH <sub>4</sub>  | -1535.4364275411  | 1060                                                   |
| <sup>3</sup> Co(CH <sub>4</sub> ) <sup>+</sup> + CO | -1535.4061216955  | 7712                                                   |
| <sup>1</sup> Co                                     | -1381.7438170917  |                                                        |
| <sup>1</sup> Co(CO) <sup>+</sup>                    | -1494.9616227574  |                                                        |
| <sup>1</sup> Co(CH <sub>4</sub> ) <sup>+</sup>      | -1422.1995042462  |                                                        |
| <sup>3</sup> Co                                     | -1381.8085429919  |                                                        |
| <sup>3</sup> Co(CO) <sup>+</sup>                    | -1495.0219963107  |                                                        |
| <sup>3</sup> Co(CH <sub>4</sub> ) <sup>+</sup>      | -1422.2641529462  |                                                        |

SA-CASPT2(2,2)/aug-cc-pVTZ single point energy corrections to DFT CP structures

| Structure | Energy (Hartrees) | Energy (cm <sup>-1</sup> ; Relative to <sup>3</sup> EC) |
|-----------|-------------------|---------------------------------------------------------|
| CP1       | -1535.3514175302  | 19718                                                   |
| CP2       | -1535.3806441164  | 13303                                                   |

MP2 Energies for neutral species with DFT structures

| Structure           | Energy (Hartrees) |
|---------------------|-------------------|
| CH <sub>3</sub> CHO | -153.5539867627   |
| CO                  | -113.1419687493   |
| CH <sub>4</sub>     | -40.4144312304    |

## RRKM Parameters

Rotational Constants, vibrational Frequencies, and zero-point energy corrections were computed at the uPBE0/aug-cc-pVTZ level of theory. Electronic energies were computed at the CASPT2(2,2)/aug-cc-pVTZ//PBE0/aug-cc-pVTZ level of theory.

| Structure         | Rotational Constants (cm <sup>-1</sup> )                           | Vibrational Frequencies (cm <sup>-1</sup> )                                                                                                                                                                        | Electronic Energy Relative to <sup>3</sup> EC (cm <sup>-1</sup> ) | Zero-Point Energy Corrections (cm <sup>-1</sup> ) |
|-------------------|--------------------------------------------------------------------|--------------------------------------------------------------------------------------------------------------------------------------------------------------------------------------------------------------------|-------------------------------------------------------------------|---------------------------------------------------|
| <sup>3</sup> INT2 | 0.317764609883825,<br>0.1321807578744717,<br>0.09507973201862346   | 80.095079 124.6264, 173.3359,<br>211.2425, 454.4832, 488.3171,<br>591.3794, 709.0368, 767.1572,<br>1135.1828, 1209.6392,<br>1379.8104, 1432.5477,<br>2048.4920, 2295.7884,<br>2968.8340, 3139.1428,<br>3201.3962,  | 13232                                                             | 11208                                             |
| <sup>3</sup> TS3  | 0.5765829055463092,<br>0.08806069283568753,<br>0.07821087967411235 | -798.7111, 83.5926, 127.5958,<br>208.9956, 304.1409,<br>397.9465, 508.2441,<br>565.7994, 651.3237,<br>784.5493, 1094.8615,<br>1378.0068, 1414.7586,<br>1806.8107, 2081.4047,<br>3016.7645, 3114.3728,<br>3182.1036 | 21488                                                             | 10360                                             |
| <sup>3</sup> PC   |                                                                    |                                                                                                                                                                                                                    | -8666                                                             | 11772                                             |

## Landau-Zener Transition Parameters

Norm of the difference gradient and reduced mass along the spin crossing coordinate were determined from normal mode analysis at the (u)PBE0/aug-cc-pVTZ level of theory. Energies (and orbitals) were computed at the SA-CASPT2(2,2)/aug-cc-pVTZ/PBE0/aug-cc-pVTZ level of theory. Spin-orbit coupling constants were computed using the full Breit-Pauli Hamiltonian at the CASCI(2,2)/aug-cc-pVTZ//PBE0/aug-cc-pVTZ level of theory.

| Structure | $\mu$ (amu)        | $ \Delta G $ (Hartree Å <sup>-1</sup> ) | H <sub>so</sub> (cm <sup>-1</sup> ) | Electronic Energy Relative to <sup>3</sup> EC (cm <sup>-1</sup> ) |
|-----------|--------------------|-----------------------------------------|-------------------------------------|-------------------------------------------------------------------|
| CP1       | 1.763937638487339  | 0.132991646134139                       | 1108.74                             | 19718                                                             |
| CP2       | 1.0372001090762852 | 0.18718519750480872                     | 389.29                              | 13303                                                             |
